# Supplementary material for: Tobacco smoking differently influences cell types of the innate and adaptive immune system—indications from CpG site methylation
Source: PubMed Central journal article supplement (PMC4973040; doi:10.1186/s13148-016-0249-7), 2016-08-03
Supplement: 13148_2016_249_MOESM5_ESM.pdf [file 13148_2016_249_MOESM5_ESM.pdf]

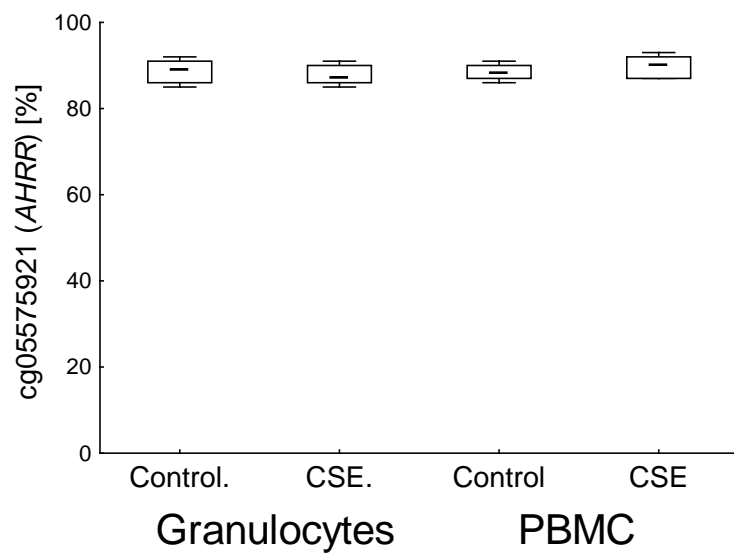

Figure S2
